# Supplementary material for: ­Complete plastid genome sequences of two species of the Neotropical genus Brunellia (Brunelliaceae)
Source: PubMed Central journal article supplement (PMC6993752; doi:10.7717/peerj.8392), 2020-01-28
Supplement: peerj-08-8392-s001.pdf [file peerj-08-8392-s001.pdf]

## SUPPLEMENTARY MATERIAL

### **Complete plastid genome sequences of two species of the Neotropical genus *Brunellia* (Brunelliaceae)**

Table S1. Sampling used for the phylogenetic analyses.

Table S2. Chloroplast genome features of *Brunellia antioquiensis* and *B. trianae*

Table S3. Plastid genes found in *Brunellia antioquiensis* and *B. trianae*

Table S4. Lengths of exons and introns for the split genes on *Brunellia antioquiensis* and *B. trianae* plastomes.

Table S5. List of repeated sequences in the plastome of *Brunellia antioquiensis*.

Table S6. List of repeated sequences in the plastome of *Brunellia trianae*.

Table S7. Nucleotide substitutions and InDels in the plastomes of *Brunellia antioquiensis* and *B. trianae*

Table S8. Phylogenetic studies that support each one of the three possible topologies among the COM clade.

Fig. S1. Plastid genome alignment from Mauve among selected COM representatives.

Fig. S2. Plastid genome alignment from mVISTA among all available sequences of COM species.

**Table S1. Sampling used for the phylogenetic analyses.**

Taxa included in the phylogenetic analysis. The samples used in the plastid genome comparison are indicated.

| Clade      | Order APG 2009 | Family         | Species                                         | Source               | GenBank Accession                                                                       | Plastid genome comparison | Original publication                  |
|------------|----------------|----------------|-------------------------------------------------|----------------------|-----------------------------------------------------------------------------------------|---------------------------|---------------------------------------|
| FABIDS     | Zygophyllales  | Zygophyllaceae | <i>Bulnesia arborea</i> Jacq. Engl.             | Ruhfel et al., 2014a | EU002159, EU002172, EU002205, EU002275, EU002299, EU002388, EU002478, GQ998005-GQ998073 |                           | Wang et al., 2009; Moore et al., 2010 |
| FABIDS     | Zygophyllales  | Zygophyllaceae | <i>Larrea tridentata</i> DC. Coville            | GenBank              | KT272174                                                                                |                           | Unpublished                           |
| FABIDS     | Zygophyllales  | Zygophyllaceae | <i>Tetraena mongolica</i> Maxim.                | GenBank              | MH325021                                                                                |                           | Unpublished                           |
| FABIDS/COM | Celastrales    | Celastraceae   | <i>Euonymus japonicus</i> Thunb.                | GenBank              | KP189362                                                                                | X                         | Choi & Park, 2016                     |
| FABIDS/COM | Celastrales    | Celastraceae   | <i>Parnassia brevistyla</i> Brieger Hand.-Mazz. | GenBank              | MG792145                                                                                | X                         | Xia et al., 2018                      |
| FABIDS/COM | Celastrales    | Rhamnaceae     | <i>Catha edulis</i> Vahl Forssk. ex Endl.       | GenBank              | KT861471                                                                                | X                         | Gu et al., 2018                       |
| FABIDS/COM | Malpighiales   | Euphorbiaceae  | <i>Jatropha curcas</i> L.                       | Ruhfel et al., 2014a | FJ695500                                                                                |                           | Asif et al., 2010                     |
| FABIDS/COM | Malpighiales   | Euphorbiaceae  | <i>Manihot esculenta</i> Crantz                 | GenBank              | EU117376                                                                                | X                         | Daniell et al., 2008                  |
| FABIDS/COM | Malpighiales   | Euphorbiaceae  | <i>Ricinus communis</i> L.                      | Ruhfel et al., 2014a | JF937588                                                                                |                           | Rivarola et al., 2011                 |
| FABIDS/COM | Malpighiales   | Passifloraceae | <i>Passiflora biflora</i> Lam.                  | Ruhfel et al., 2014a | EU017064-EU017138                                                                       |                           | Jansen et al., 2007                   |

|                           |                   |                      |                                                                   |                      |                                                                                                                  |          |                                       |
|---------------------------|-------------------|----------------------|-------------------------------------------------------------------|----------------------|------------------------------------------------------------------------------------------------------------------|----------|---------------------------------------|
| FABIDS/COM                | Malpighiales      | Salicaceae           | <i>Populus alba</i> L.                                            | Ruhfel et al., 2014a | AP008956                                                                                                         |          | Okumura et al., 2006                  |
| FABIDS/COM                | Malpighiales      | Salicaceae           | <i>Salix babylonica</i> L.                                        | GenBank              | KT449800                                                                                                         | X        | Wang & Yang, 2016                     |
| <b>FABIDS/COM</b>         | <b>Oxalidales</b> | <b>Brunelliaceae</b> | <b><i>Brunellia antioquiensis</i></b><br><b>Cuatrec. Cuatrec.</b> | <b>This study</b>    |                                                                                                                  | <b>X</b> | <b>This study</b>                     |
| <b>FABIDS/COM</b>         | <b>Oxalidales</b> | <b>Brunelliaceae</b> | <b><i>Brunellia trianae</i></b><br><b>Cuatrec.</b>                | <b>This study</b>    |                                                                                                                  | <b>X</b> | <b>This study</b>                     |
| FABIDS/COM                | Oxalidales        | Cunoniaceae          | <i>Ceratopetalum apetalum</i><br>D.Don                            | GenBank              | KT716495                                                                                                         | X        | Foster et al., 2016                   |
| FABIDS/COM                | Oxalidales        | Elaeocarpaceae       | <i>Sloanea australis</i><br>F.Muell.                              | GenBank              | KT716504                                                                                                         | X        | Foster et al., 2016                   |
| FABIDS/COM                | Oxalidales        | Oxalidaceae          | <i>Averrhoa carambola</i> L.                                      | GenBank              | KU569488                                                                                                         | X        | Jo et al., 2016                       |
| FABIDS/COM                | Oxalidales        | Oxalidaceae          | <i>Oxalis latifolia</i> Kunth                                     | Ruhfel et al., 2014a | EU002165,<br>EU002186,<br>EU002248,<br>EU002282,<br>EU002350,<br>EU002438,<br>EU002528,<br>GQ998511-<br>GQ998580 |          | Wang et al., 2009; Moore et al., 2010 |
| FABIDS/<br>N-fixing clade | Cucurbitales      | Cucurbitaceae        | <i>Cucumis melo</i> L.                                            | GenBank              | JF412791                                                                                                         |          | Rodríguez-Moreno et al., 2011         |
| FABIDS/<br>N-fixing clade | Fabales           | Fabaceae             | <i>Arachis hypogaea</i> L.                                        | GenBank              | KJ468094                                                                                                         |          | Schwarz et al., 2015                  |
| FABIDS/<br>N-fixing clade | Fabales           | Fabaceae             | <i>Glycine max</i> L.Merr.                                        | Ruhfel et al., 2014a | DQ317523                                                                                                         |          | Saski et al., 2005                    |
| FABIDS<br>/N-fixing clade | Fagales           | Fagaceae             | <i>Castanea mollissima</i><br>Blume                               | GenBank              | KY951992                                                                                                         |          | Cheng et al., 2018                    |

|                           |                 |               |                                                 |                      |                                                                                                                  |                                             |
|---------------------------|-----------------|---------------|-------------------------------------------------|----------------------|------------------------------------------------------------------------------------------------------------------|---------------------------------------------|
| FABIDS/<br>N-fixing clade | Fagales         | Fagaceae      | <i>Quercus nigra</i> L.                         | Ruhfel et al., 2014a | EU002167,<br>EU002188,<br>EU002254,<br>EU002284,<br>EU002357,<br>EU002445,<br>EU002535,<br>GQ998653-<br>GQ998724 | Wang et al.,<br>2009; Moore et<br>al., 2010 |
| FABIDS/<br>N-fixing clade | Rosales         | Moraceae      | <i>Ficus racemosa</i> L.                        | GenBank              | KT368151                                                                                                         | Mao & Bi, 2016                              |
| FABIDS/<br>N-fixing clade | Rosales         | Moraceae      | <i>Morus indica</i> L.                          | Ruhfel et al., 2014a | DQ226511                                                                                                         | Ravi et al., 2006                           |
| FABIDS/<br>N-fixing clade | Rosales         | Rosaceae      | <i>Pentactina rupicola</i> Nakai                | Ruhfel et al., 2014a | JQ041763                                                                                                         | Kim & Kim,<br>2016                          |
| FABIDS/<br>N-fixing clade | Rosales         | Rosaceae      | <i>Prunus persica</i> L. Batsch                 | GenBank              | HQ336405                                                                                                         | Jansen et al.,<br>2011                      |
| MALVIDS                   | Brassicales     | Brassicaceae  | <i>Arabidopsis thaliana</i> L.<br>Heynh.        | Ruhfel et al., 2014a | AP000423                                                                                                         | Sato, 1999                                  |
| MALVIDS                   | Brassicales     | Brassicaceae  | <i>Arabis alpina</i> L.                         | GenBank              | HF934132                                                                                                         | Melodelima &<br>Lobréaux, 2013              |
| MALVIDS                   | Brassicales     | Caricaceae    | <i>Carica papaya</i> L.                         | Ruhfel et al., 2014a | EU431223                                                                                                         | Unpublished                                 |
| MALVIDS                   | Crossosomatales | Staphyleaceae | <i>Staphylea colchica</i> Steven                | Ruhfel et al., 2014a | EU002168,<br>EU002189,<br>EU002261,<br>EU002285,<br>EU002364,<br>EU002453,<br>EU002543,<br>GQ998725-<br>GQ998796 | Wang et al.,<br>2009; Moore et<br>al., 2010 |
| MALVIDS                   | Geraniales      | Geraniaceae   | <i>Pelargonium quercifolium</i><br>L. f. L'Hér. | GenBank              | KM527897                                                                                                         | Weng, Ruhlman<br>& Jansen, 2017             |

|             |               |               |                                              |                      |                                                                                                                  |                                             |
|-------------|---------------|---------------|----------------------------------------------|----------------------|------------------------------------------------------------------------------------------------------------------|---------------------------------------------|
| MALVIDS     | Geraniales    | Vivianiaceae  | <i>Viviania marifolia</i> Cav.               | GenBank              | KF240615                                                                                                         | Weng et al., 2014                           |
| MALVIDS     | Malvales      | Malvaceae     | <i>Aquilaria yunnanensis</i><br>S.C.Huang    | GenBank              | MG656407                                                                                                         | Zhang et al.,<br>2019                       |
| MALVIDS     | Malvales      | Malvaceae     | <i>Gossypium arboreum</i> L.                 | Ruhfel et al., 2014a | HQ325740                                                                                                         | Xu et al., 2012                             |
| MALVIDS     | Malvales      | Malvaceae     | <i>Heritiera angustata</i> Pierre            | GenBank              | MG897126                                                                                                         | Zhao et al., 2018                           |
| MALVIDS     | Myrtales      | Myrtaceae     | <i>Eucalyptus grandis</i><br>W.Hill          | GenBank              | HM347959                                                                                                         | Paiva et al., 2011                          |
| MALVIDS     | Myrtales      | Onagraceae    | <i>Oenothera parviflora</i> L.               | Ruhfel et al., 2014a | EU262891                                                                                                         | Greiner et al.,<br>2008                     |
| MALVIDS     | Sapindales    | Anacardiaceae | <i>Spondias tuberosa</i> Arruda<br>ex Koster | GenBank              | KU756562                                                                                                         | Santos et al.,<br>2019                      |
| MALVIDS     | Sapindales    | Rutaceae      | <i>Citrus sinensis</i> L. Osbeck             | Ruhfel et al., 2014a | DQ864733                                                                                                         | Bausher et al.,<br>2006                     |
| SUPERROSIDS | Saxifragaceae | Altingiaceae  | <i>Liquidambar styraciflua</i><br>L.         | Ruhfel et al., 2014a | EU002164,<br>EU002182,<br>EU002239,<br>EU002281,<br>EU002341,<br>EU002429,<br>EU002519,<br>GQ998438-<br>GQ998510 | Wang et al.,<br>2009; Moore et<br>al., 2010 |
| SUPERROSIDS | Saxifragaceae | Saxifragaceae | <i>Heuchera sanguinea</i><br>Engelm.         | Ruhfel et al., 2014a | EU002163,<br>EU002180,<br>EU002228,<br>EU002280,<br>EU002327,<br>EU002415,<br>EU002506,<br>GQ998365-<br>GQ998437 | Wang et al.,<br>2009; Moore et<br>al., 2010 |
| SUPERROSIDS | Vitales       | Vitaceae      | <i>Vitis acerifolia</i> Raf.                 | GenBank              | LC317004                                                                                                         | Zecca et al., 2019                          |

**Table S2. Chloroplast genome features of *Brunellia antioquiensis* and *B. trianae***

|                         | <i>B. antioquiensis</i> |        | <i>B. trianae</i> |        |
|-------------------------|-------------------------|--------|-------------------|--------|
|                         | bp (%)                  | GC (%) | bp (%)            | GC (%) |
| rRNA                    | 9,050 (5.73%)           | 55.45  | 9,050 (5.73%)     | 55.45  |
| tRNA                    | 2,927 (1.85%)           | 52.75  | 2,927 (1.85)      | 52.75  |
| proteins coding regions | 82,209 (52.13%)         | 37.89  | 82,218 (52.14%)   | 37.89  |
| Intergenic regions      | 64,140 (40.67%)         | 32.84  | 64,208 (40.71%)   | 32.84  |
| Introns                 | 16,289 (10.33%)         | 34.9   | 16,289 (10.32%)   | 34.9   |

**Table S3. Plastid genes found in *Brunellia antioquensis* and *B. trianae***

| Category                              | Groups of gene                         | Name of genes                                                                                                                                                                                                                                                                                                                                                                                                                                                                                                                                                                                     |
|---------------------------------------|----------------------------------------|---------------------------------------------------------------------------------------------------------------------------------------------------------------------------------------------------------------------------------------------------------------------------------------------------------------------------------------------------------------------------------------------------------------------------------------------------------------------------------------------------------------------------------------------------------------------------------------------------|
| Protein synthesis and DNA-replication | Transfer RNAs                          | <i>trnA-UGC</i> (× 2), <i>trnC-GCA</i> , <i>trnD-GUC</i> , <i>trnE-UUC</i> , <i>trnF-GAA</i> , <i>trnM-CAU</i> , <i>trnG-GCC</i> , <i>trnG-UCC</i> , <i>trnH-GUG</i> , <i>trnI-CAU</i> (× 2), <i>trnI-GAU</i> (× 2), <i>trnK-UUU</i> , <i>trnL-CAA</i> (× 2), <i>trnL-UAA</i> , <i>trnL-UAG</i> , <i>trnM-CAU</i> , <i>trnN-GUU</i> (× 2), <i>trnP-UGG</i> , <i>trnQ-UUG</i> , <i>trnR-ACG</i> (× 2), <i>trnR-UCU</i> , <i>trnS-GCU</i> , <i>trnS-GGA</i> , <i>trnS-UGA</i> , <i>trnT-GGU</i> , <i>trnT-UGU</i> , <i>trnV-GAC</i> (× 2), <i>trnV-UAC</i> (× 2), <i>trnW-CCA</i> , <i>trnY-GUA</i> |
|                                       | Ribosomal RNAs                         | <i>rrn16</i> (× 2), <i>rrn23</i> (× 2), <i>rrn4.5</i> (× 2), <i>rrn5</i> (× 2)                                                                                                                                                                                                                                                                                                                                                                                                                                                                                                                    |
|                                       | Ribosomal protein small subunit        | <i>rps2</i> , <i>rps3</i> , <i>rps4</i> , <i>rps7</i> (× 2), <i>rps8</i> , <i>rps11</i> , <i>rps12</i> (× 3), <i>rps14</i> , <i>rps15</i> , <i>rps16</i> , <i>rps18</i> , <i>rps19</i>                                                                                                                                                                                                                                                                                                                                                                                                            |
|                                       | Ribosomal protein large subunit        | <i>rpl2</i> (× 2), <i>rpl14</i> , <i>rpl16</i> , <i>rpl20</i> , <i>rpl22</i> , <i>rpl23</i> (× 2), <i>rpl33</i> , <i>rpl36</i>                                                                                                                                                                                                                                                                                                                                                                                                                                                                    |
|                                       | Subunits of RNA polymerase             | <i>rpoA</i> , <i>rpoB</i> , <i>rpoC1</i> , <i>rpoC2</i>                                                                                                                                                                                                                                                                                                                                                                                                                                                                                                                                           |
|                                       | Photosystem I                          | <i>psaA</i> , <i>psaB</i> , <i>psaC</i> , <i>psaI</i> , <i>psaJ</i>                                                                                                                                                                                                                                                                                                                                                                                                                                                                                                                               |
| Photosynthesis                        | Photosystem I assembly protein         | <i>ycf4</i>                                                                                                                                                                                                                                                                                                                                                                                                                                                                                                                                                                                       |
|                                       | Photosystem II                         | <i>psbA</i> , <i>psbB</i> , <i>psbC</i> , <i>psbD</i> , <i>psbE</i> , <i>psbF</i> , <i>psbH</i> , <i>psbI</i> , <i>psbJ</i> , <i>psbK</i> , <i>psbL</i> , <i>psbM</i> , <i>psbN</i> , <i>psbT</i> , <i>psbZ</i>                                                                                                                                                                                                                                                                                                                                                                                   |
|                                       | Cytochrome b/f complex                 | <i>petA</i> , <i>petB</i> , <i>petD</i> , <i>petG</i> , <i>petL</i> , <i>petN</i>                                                                                                                                                                                                                                                                                                                                                                                                                                                                                                                 |
|                                       | ATP synthase                           | <i>atpA</i> , <i>atpB</i> , <i>atpE</i> , <i>atpF</i> , <i>atpH</i> , <i>atpI</i>                                                                                                                                                                                                                                                                                                                                                                                                                                                                                                                 |
|                                       | NADH-dehydrogenase                     | <i>ndhA</i> , <i>ndhB</i> (× 2), <i>ndhC</i> , <i>ndhD</i> , <i>ndhE</i> , <i>ndhF</i> , <i>ndhG</i> , <i>ndhH</i> , <i>ndhI</i> , <i>ndhJ</i> , <i>ndhK</i>                                                                                                                                                                                                                                                                                                                                                                                                                                      |
|                                       | Large subunit Rubisco                  | <i>rbcL</i>                                                                                                                                                                                                                                                                                                                                                                                                                                                                                                                                                                                       |
| Miscellaneous group                   | Acetyl-CoA carboxylase                 | <i>accD</i>                                                                                                                                                                                                                                                                                                                                                                                                                                                                                                                                                                                       |
|                                       | Cytochrome c biogenesis                | <i>ccsA</i>                                                                                                                                                                                                                                                                                                                                                                                                                                                                                                                                                                                       |
|                                       | Inner membrane protein                 | <i>cemA</i>                                                                                                                                                                                                                                                                                                                                                                                                                                                                                                                                                                                       |
|                                       | ATP-dependent protease                 | <i>clpP</i>                                                                                                                                                                                                                                                                                                                                                                                                                                                                                                                                                                                       |
|                                       | Translation initiation factor          | <i>infA</i>                                                                                                                                                                                                                                                                                                                                                                                                                                                                                                                                                                                       |
|                                       | Maturase                               | <i>matK</i>                                                                                                                                                                                                                                                                                                                                                                                                                                                                                                                                                                                       |
|                                       | Translocon at the inner membrane       | <i>ycf1</i>                                                                                                                                                                                                                                                                                                                                                                                                                                                                                                                                                                                       |
| Enhancing stress tolerance            | <i>ycf3</i>                            |                                                                                                                                                                                                                                                                                                                                                                                                                                                                                                                                                                                                   |
| Gene unknown function                 |                                        | <i>ycf2</i> (× 2), <i>ycf15</i> (× 2)                                                                                                                                                                                                                                                                                                                                                                                                                                                                                                                                                             |
| Pseudogene unknown function           | Conserved hypothetical chloroplast ORF | <i>ψycf1</i>                                                                                                                                                                                                                                                                                                                                                                                                                                                                                                                                                                                      |

**Table S4. Lengths of exons and introns for the split genes on *Brunellia antioquiensis* and *B. trianae* plastomes.**

Variations of *B. trianae* are in parentheses.

| Gene Name       | Region | Exon I<br>(bp) | Intron I<br>(bp) | Exon II<br>(bp) | Intron II<br>(bp) | Exon III<br>(bp) | Total size   |
|-----------------|--------|----------------|------------------|-----------------|-------------------|------------------|--------------|
| <i>rps16</i>    | LSC    | 42             | 919              | 230             |                   |                  | 1,191        |
| <i>atpF</i>     | LSC    | 411            | 722              | 144             |                   |                  | 1,277        |
| <i>rpoC1</i>    | LSC    | 1619           | 754              | 430             |                   |                  | 2,803        |
| <i>ycf3</i>     | LSC    | 153            | 691(692)         | 228             | 736               | 126              | 1,935(1,934) |
| <i>clpP</i>     | LSC    | 228            | 618(617)         | 292             | 834               | 71               | 2,042(2,043) |
| <i>petB</i>     | LSC    | 9              | 779              | 648             |                   |                  | 1,436        |
| <i>petD</i>     | LSC    | 8              | 710              | 475             |                   |                  | 1,193        |
| <i>rpl16</i>    | LSC    | 397            | 1036             | 12              |                   |                  | 1,445        |
| <i>rps12</i>    | IR     | 434            | 659              | 397             |                   |                  | 1,490        |
| <i>rps12</i>    | LSC    | 114            | -                | 27              | 539               | 231              |              |
| <i>ndhB</i>     | IR     | 756            | 679              | 777             |                   |                  | 2,212        |
| <i>ndhA</i>     | SSC    | 558            | 1,102            | 540             |                   |                  | 2,200        |
| <i>trnK-UUU</i> | LSC    | 35             | 2,549            | 37              |                   |                  | 2,621        |
| <i>trnG-UCC</i> | LSC    | 23             | 744              | 48              |                   |                  | 815          |
| <i>trnL-UAA</i> | LSC    | 37             | 544              | 50              |                   |                  | 631          |
| <i>trnV-UAC</i> | LSC    | 37             | 593              | 39              |                   |                  | 669          |
| <i>trnI-GAU</i> | IR     | 42             | 938              | 35              |                   |                  | 1,015        |
| <i>trnA-UGC</i> | IR     | 38             | 802              | 35              |                   |                  | 875          |



**Table S5. List of repeated sequences in the plastome of *Brunellia antioquiensis*.**

C: complement match, F: forward (direct) match, P: palindromic match, R: reverse match.

| Repeat length (bp) | Repeat A  |                                         |        | Repeat B  |                                         |        | Repeat type |
|--------------------|-----------|-----------------------------------------|--------|-----------|-----------------------------------------|--------|-------------|
|                    | Star site | Location                                | Region | Star site | Location                                | Region |             |
| 30                 | 8,544     | <i>trnS-GCU</i>                         | LSC    | 47,779    | <i>trnS-GCU</i>                         | LSC    | P           |
| 30                 | 41,110    | <i>psaB</i>                             | LSC    | 43,334    | <i>psaA</i>                             | LSC    | F           |
| 28                 | 33,878    | intergenic ( <i>trnT-GGU-psbD</i> )     | LSC    | 33,891    | intergenic ( <i>trnT-GGU-psbD</i> )     | LSC    | F           |
| 24                 | 128,836   | intergenic ( <i>trnL-UAG-ndhF</i> )     | SSC    | 128,860   | intergenic ( <i>trnL-UAG-ndhF</i> )     | SSC    | F           |
| 23                 | 66,708    | intergenic ( <i>petA-psbJ</i> )         | LSC    | 66,748    | intergenic ( <i>petA-psbJ</i> )         | LSC    | P           |
| 23                 | 94,637    | <i>ycf2</i>                             | IRB    | 94,673    | <i>ycf2</i>                             | IRB    | F           |
| 23                 | 94,637    | <i>ycf2</i>                             | IRB    | 150,384   | <i>ycf2</i>                             | IRA    | P           |
| 23                 | 94,673    | <i>ycf2</i>                             | IRB    | 150,420   | <i>ycf2</i>                             | IRA    | P           |
| 23                 | 150,384   | <i>ycf2</i>                             | IRA    | 150,420   | <i>ycf2</i>                             | IRA    | P           |
| 22                 | 4,901     | intergenic ( <i>matK-rps16</i> )        | LSC    | 9,205     | intergenic ( <i>trnS-GCU-trnR-UCU</i> ) | LSC    | P           |
| 22                 | 10,448    | intergenic ( <i>trnG-UCC-trnR-UCU</i> ) | LSC    | 10,475    | intergenic ( <i>trnG-UCC-trnR-UCU</i> ) | LSC    | P           |
| 22                 | 17,397    | intergenic ( <i>rps2-rpoC2</i> )        | LSC    | 72,053    | intergenic ( <i>rpl20-clpP</i> )        | LSC    | R           |
| 21                 | 8,550     | <i>trnS-GCU</i>                         | LSC    | 37,852    | <i>trnS-UGA</i>                         | LSC    | F           |
| 21                 | 9,203     | intergenic ( <i>trnS-GCU-trnG-UCC</i> ) | LSC    | 125,118   | intergenic ( <i>psaC-ndhD</i> )         | SSC    | R           |
| 21                 | 9,203     | intergenic ( <i>trnS-GCU-trnG-UCC</i> ) | LSC    | 125,118   | intergenic ( <i>psaC-ndhD</i> )         | SSC    | F           |
| 21                 | 10,622    | intergenic ( <i>trnS-GCU-trnG-UCC</i> ) | LSC    | 85,637    | <i>rpl16</i>                            | LSC    | C           |
| 21                 | 37,852    | <i>trnS-UGA</i>                         | LSC    | 47,782    | <i>trnS-GGA</i>                         | LSC    | P           |
| 21                 | 53,251    | <i>ndhK</i>                             | LSC    | 59,847    | Intergenic ( <i>rbcL-accD</i> )         | LSC    | P           |
| 21                 | 94,609    | <i>ycf2</i>                             | IRB    | 150,360   | <i>ycf2</i>                             | IRA    | P           |
| 21                 | 94,699    | <i>ycf2</i>                             | IRB    | 150,450   | <i>ycf2</i>                             | IRA    | F           |
| 21                 | 102,391   | intergenic ( <i>rps7-trnV-GAC</i> )     | IRB    | 142,668   | intergenic ( <i>trnV-GAC-rps7</i> )     | IRA    | C           |
| 21                 | 150,360   | <i>ycf2</i>                             | IRB    | 150,450   | <i>ycf2</i>                             | IRA    | F           |
| 20                 | 5,543     | intergenic ( <i>matK-rps16</i> )        | LSC    | 13,886    | intergenic ( <i>atpF-atpH</i> )         | LSC    | R           |
| 20                 | 10,624    | intergenic ( <i>trnS-GCU-trnR-UCU</i> ) | LSC    | 57,156    | intergenic ( <i>atpB-rbcL</i> )         | LSC    | P           |
| 20                 | 13,216    | <i>atpF</i>                             | LSC    | 74,489    | <i>clpP</i>                             | LSC    | R           |
| 20                 | 37,920    | <i>trnS-UGA</i>                         | LSC    | 47,721    | <i>trnS-GGA</i>                         | LSC    | P           |

**Table S6. List of repeated sequences in the plastome of *Brunellia trianae*.**

C: complement match, F: forward (direct) match, P: palindromic match, R: reverse match.

| Repeat A           |           |                                         |        | Repeat B  |                                         |        |             |
|--------------------|-----------|-----------------------------------------|--------|-----------|-----------------------------------------|--------|-------------|
| Repeat length (bp) | Star site | Location                                | Region | Star site | Location                                | Region | Repeat type |
| 88                 | 30,289    | intergenic ( <i>petN-psbM</i> )         | LSC    | 30,311    | intergenic ( <i>petN-psbM</i> )         | LSC    | F           |
| 66                 | 30,289    | intergenic ( <i>petN-psbM</i> )         | LSC    | 30,333    | intergenic ( <i>petN-psbM</i> )         | LSC    | F           |
| 44                 | 30,289    | intergenic ( <i>petN-psbM</i> )         | LSC    | 30,355    | intergenic ( <i>petN-psbM</i> )         | LSC    | F           |
| 30                 | 8,525     | <i>trnS-GCU</i>                         | LSC    | 47,831    | <i>trnS-GGA</i>                         | LSC    | P           |
| 30                 | 41,161    | <i>psaB</i>                             | LSC    | 43,385    | <i>psaA</i>                             | LSC    | F           |
| 28                 | 33,943    | intergenic ( <i>trnT-GGU-psbD</i> )     | LSC    | 33,956    | intergenic ( <i>trnT-GGU-psbD</i> )     | LSC    | F           |
| 24                 | 17,380    | intergenic ( <i>rps2-rpoC2</i> )        | LSC    | 72,122    | intergenic ( <i>rpl20-clpP</i> )        | LSC    | C           |
| 24                 | 128,913   | intergenic ( <i>trnL-UAG-ndhF</i> )     | SSC    | 128,937   | intergenic ( <i>trnL-UAG-ndhF</i> )     | SSC    | F           |
| 23                 | 9,182     | intergenic ( <i>trnS-GCU-trnR-UUC</i> ) | LSC    | 17,377    | intergenic ( <i>rps2-rpoC2</i> )        | LSC    | F           |
| 23                 | 66,778    | intergenic ( <i>petA-psbj</i> )         | LSC    | 66,818    | intergenic ( <i>petA-psbj</i> )         | LSC    | P           |
| 23                 | 94,710    | <i>ycf2</i>                             | IRB    | 94,746    | <i>ycf2</i>                             | IRB    | F           |
| 23                 | 94,710    | <i>ycf2</i>                             | IRB    | 150,461   | <i>ycf2</i>                             | IRA    | P           |
| 23                 | 94,746    | <i>ycf2</i>                             | IRB    | 150,497   | <i>ycf2</i>                             | IRA    | P           |
| 23                 | 150,461   | <i>ycf2</i>                             | IRA    | 150,497   | <i>ycf2</i>                             | IRA    | F           |
| 22                 | 10,429    | intergenic ( <i>trnS-GCU-trnR-UCU</i> ) | LSC    | 10,456    | intergenic ( <i>trnS-GCU-trnR-UCU</i> ) | LSC    | P           |
| 22                 | 30,289    | intergenic ( <i>petN-psbM</i> )         | LSC    | 30,377    | intergenic ( <i>petN-psbM</i> )         | LSC    | F           |
| 21                 | 8,531     | <i>trnS-GCU</i>                         | LSC    | 37,917    | <i>trnS-UGA</i>                         | LSC    | F           |
| 21                 | 37,917    | <i>trnS-UGA</i>                         | LSC    | 47,834    | <i>trnS-GGA</i>                         | LSC    | P           |

**Table S7. Nucleotide substitutions and InDels in the plastomes of *Brunellia antioquiensis* and *B. trianae***

| Polymorphism | Length (bp) | Motif         | Marker              | Location   | Region |
|--------------|-------------|---------------|---------------------|------------|--------|
| InDel        | 1           | A             | <i>matK-trnK</i>    | intergenic | LSC    |
| InDel        | 1           | A             | <i>trnK-rps16</i>   | intergenic | LSC    |
| InDel        | 1           | A             | <i>trnK-rps16</i>   | intergenic | LSC    |
| InDel        | 1           | A             | <i>trnG-trnR</i>    | intergenic | LSC    |
| InDel        | 1           | A             | <i>rpoB-trnC</i>    | intergenic | LSC    |
| InDel        | 1           | A             | <i>rps18-rpl20</i>  | intergenic | LSC    |
| InDel        | 1           | A             | <i>petB-petD</i>    | intergenic | LSC    |
| InDel        | 1           | A             | <i>petD-rpoA</i>    | intergenic | LSC    |
| InDel        | 1           | A             | <i>ndhA intron</i>  | intron     | SSC    |
| InDel        | 1           | T             | <i>rps19-rpl2</i>   | intergenic | IR     |
| InDel        | 1           | T             | <i>petN-psbM</i>    | intergenic | LSC    |
| InDel        | 1           | T             | <i>ndhC-trnV</i>    | intergenic | LSC    |
| InDel        | 1           | T             | <i>atpB-rbcL</i>    | intergenic | LSC    |
| InDel        | 1           | T             | <i>rpl20-rps12</i>  | intergenic | LSC    |
| InDel        | 1           | T             | <i>rpl20-rps12</i>  | intergenic | LSC    |
| InDel        | 1           | T             | <i>ccsA-ndhD</i>    | intergenic | SSC    |
| InDel        | 1           | T             | <i>atpF intron</i>  | intron     | LCS    |
| InDel        | 1           | T             | <i>atpF intron</i>  | intron     | LCS    |
| InDel        | 1           | T             | <i>yef3 intron</i>  | intron     | LSC    |
| InDel        | 1           | T             | <i>clpP intron</i>  | intron     | LSC    |
| InDel        | 2           | AA            | <i>rpl2-trnH</i>    | intergenic | IR     |
| InDel        | 2           | TG            | <i>rpl16 intron</i> | intron     | LSC    |
| InDel        | 4           | TGAA          | <i>ndhF-trnL</i>    | intergenic | SSC    |
| InDel        | 7           | TTATATT       | <i>trnK-rps16</i>   | intergenic | LSC    |
| InDel        | 9           | CGGTGTAAT     | <i>rpoC2</i>        | gene       | LSC    |
| InDel        | 13          | GAAAAAAAAAAAA | <i>rps2-rpoC4</i>   | intergenic | LSC    |
| InDel        | 13          | TTCTTTTTTTTTT | <i>rps2-rpoC2</i>   | intergenic | LSC    |

|       |    |                                                       |                    |            |     |
|-------|----|-------------------------------------------------------|--------------------|------------|-----|
| InDel | 14 | TATAATATAATTAT                                        | <i>psbZ-trnG</i>   | intergenic | LSC |
| InDel | 14 | TTATTTATTATTTA                                        | <i>atpH-atpI</i>   | intergenic | LSC |
| InDel | 20 | AAAATTAATAAATTCAATT                                   | <i>petA-psbJ</i>   | intergenic | LSC |
| InDel | 83 | (TTTAATTTAACTATTAACCTTTATTT<br>AATTAACTATTAACCTTTA)x2 | <i>petN-psbM</i>   | intergenic | LSC |
| Ts    | 1  | C→T                                                   | <i>rpl2 intron</i> | intergenic | IR  |
| Ts    | 1  | C→T                                                   | <i>trnL-ndhB</i>   | intergenic | IR  |
| Ts    | 1  | C→T                                                   | <i>psaJ-rpl33</i>  | intergenic | LSC |
| Ts    | 1  | G→A                                                   | <i>trnL-trnF</i>   | intergenic | LSC |
| Ts    | 1  | G→A                                                   | <i>ndhG-ndhI</i>   | intergenic | SSC |
| Ts    | 1  | T→C                                                   | <i>rpl36-infA</i>  | intergenic | LSC |
| Ts; N | 1  | C→T                                                   | <i>ndhH</i>        | gene       | SSC |
| Ts; N | 1  | G→A                                                   | <i>rpoC1</i>       | gene       | LSC |
| Ts; N | 1  | G→A                                                   | <i>rpoC1</i>       | gene       | LSC |
| Ts; N | 1  | T→C                                                   | <i>rpoA</i>        | gene       | LSC |
| Ts; S | 1  | A→G                                                   | <i>ycf1</i>        | gene       | SSC |
| Ts; S | 1  | T→C                                                   | <i>rps14</i>       | gene       | LSC |
| Ts; S | 1  | T→C                                                   | <i>psaB</i>        | gene       | LSC |
| Ts; S | 1  | T→C                                                   | <i>accD</i>        | gene       | LSC |
| Ts; S | 1  | T→C                                                   | <i>ycf1</i>        | gene       | SSC |
| Tv    | 1  | A→T                                                   | <i>trnK-rps16</i>  | intergenic | LSC |
| Tv    | 1  | A→T                                                   | <i>rps2-rpoC3</i>  | intergenic | LSC |
| Tv    | 1  | A→T                                                   | <i>petD-rpoA</i>   | intergenic | LSC |
| Tv    | 1  | A→T                                                   | <i>petD-rpoA</i>   | intergenic | LSC |
| Tv    | 1  | A→T                                                   | <i>ndhF-trnL</i>   | intergenic | SSC |
| Tv    | 1  | A→T                                                   | <i>ndhF-trnL</i>   | intergenic | SSC |
| Tv    | 1  | C→G                                                   | <i>trnP-psaJ</i>   | intergenic | LSC |
| Tv    | 1  | G→C                                                   | <i>petD-rpoA</i>   | intergenic | LSC |
| Tv    | 1  | G→T                                                   | <i>trnS-trnG</i>   | intergenic | LSC |
| Tv    | 1  | G→T                                                   | <i>rps2-rpoC3</i>  | intergenic | LSC |
| Tv    | 1  | G→T                                                   | <i>rpoB-trnC</i>   | intergenic | LSC |

|       |   |     |                   |               |     |
|-------|---|-----|-------------------|---------------|-----|
| Tv    | 1 | G→T | <i>trnL-ccsA</i>  | intergenic    | SSC |
| Tv    | 1 | G→T | <i>ndhI-ndhA</i>  | intergenic    | SSC |
| Tv    | 1 | G→T | <i>trnG</i>       | non-translate | LSC |
| Tv    | 1 | T→A | <i>rps2-rpoC3</i> | intergenic    | LSC |
| Tv    | 1 | T→A | <i>ndhD-psaC</i>  | intergenic    | SSC |
| Tv    | 1 | T→G | <i>trnE-trnG</i>  | intergenic    | LSC |
| Tv; N | 1 | A→T | <i>ycf1</i>       | gene          | SSC |
| Tv; N | 1 | C→A | <i>psaA</i>       | gene          | LSC |
| Tv; N | 1 | C→A | <i>ndhG</i>       | gene          | SSC |
| Tv; N | 1 | G→T | <i>rpl22</i>      | gene          | LSC |
| Tv; N | 1 | T→G | <i>ycf1</i>       | gene          | SSC |

---

**Table S8. Phylogenetic studies that support each one of the three possible topologies among the COM clade.**

Inferences made based on only one gene were not included. Internal node support correspond to Bootstrap values except for the ones indicated with JK (jackknife support) or PP (Posterior Probability).

| Publication                         | No. genes | Genome                          | Support value for the internal node |
|-------------------------------------|-----------|---------------------------------|-------------------------------------|
| (C(O,M)) topology                   |           |                                 |                                     |
| Davis & Wurdack, 2004               | 3         | mitochondrial, nuclear          | 52                                  |
| Zhu et al., 2007                    | 4         | plastid, mitochondrial, nuclear | <50                                 |
| Wang et al., 2009                   | 12        | plastid, nuclear                | <50                                 |
| Wurdack & Davis, 2009               | 13        | plastid, mitochondrial, nuclear | 86/97                               |
| Qiu et al., 2010                    | 4         | mitochondrial                   | 97                                  |
| Soltis et al., 2011                 | 17        | plastid, mitochondrial, nuclear | 59                                  |
| Ruhfel et al., 2014                 | 78        | plastid (1,2 codon positions)   | 52                                  |
| Wu et al., 2014                     | 79        | plastid                         | 48                                  |
| Sun et al., 2015                    | 4         | mitochondrial                   | 83                                  |
| Sun et al., 2016                    | 4         | plastid, mitochondrial          | <50                                 |
| ((C,O)M) topology                   |           |                                 |                                     |
| Nickrent, Der & Anderson, 2005      | 4         | plastid, mitochondrial, nuclear | 56                                  |
| Moore et al., 2010                  | 87        | plastid                         | 88                                  |
| Ruhfel et al., 2014                 | 78        | plastid                         | 91                                  |
| Sun et al., 2015                    | 78        | plastid                         | 81                                  |
| Chen et al., 2016                   | 5         | plastid, mitochondrial          | 44                                  |
| Jo et al., 2016                     | 80        | plastid                         | 100                                 |
| Cauz-Santos et al., 2017            | 43        | plastid                         | 87                                  |
| Gitzendanner et al., 2018           | 78        | plastid (amino acids)           | 59                                  |
| ((C,M)O) topology                   |           |                                 |                                     |
| Zhang & Simmons, 2006               | 7         | plastid, nuclear                | 87JK                                |
| Soltis, Gitzendanner & Soltis, 2007 | 3         | plastid, nuclear                | 54PP                                |
| Burleigh, Hilu & Soltis, 2009       | 5         | plastid, nuclear                | 58                                  |
| Moore et al., 2011                  | (IR)      | plastid                         | 49                                  |
| Li et al., 2019                     | 80        | plastid                         | 85                                  |

**Fig. S1. Plastid genome alignment from Mauve among selected COM representatives.**

One IR was removed in all species. For each sequence, the first line shows the collinear blocks, the second line represents the plastid sequence with white boxes for protein-coding regions, green boxes for tRNAs, red boxes for rRNAs, and pink boxes for the exact location of the IR (when available). Clade abbreviations are indicated by “M” for Malpighiales, “C” for Celastrales and “O” for Oxalidales.

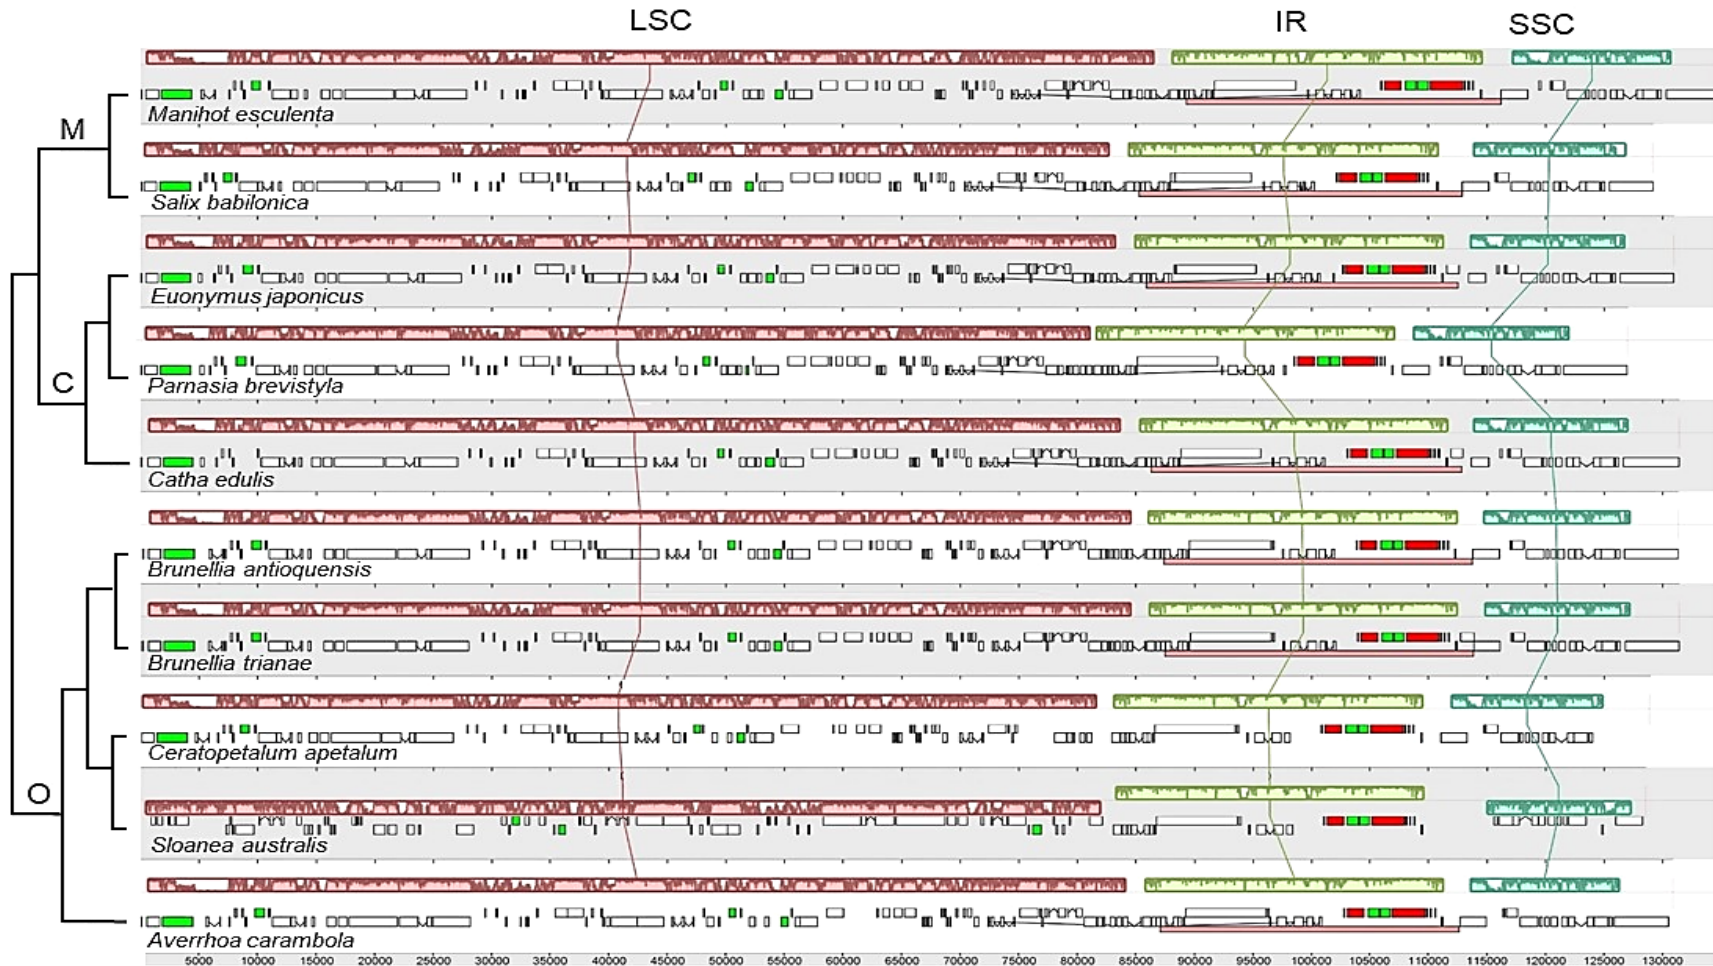

**Fig. S2. Plastid genome alignment from mVISTA among all available sequences of COM species.**

Reference sequence: *B. antioquiensis*. Clade abbreviations are indicated by “M” for Malpighiales, “C” for Celastrales and “O” for Oxalidales.

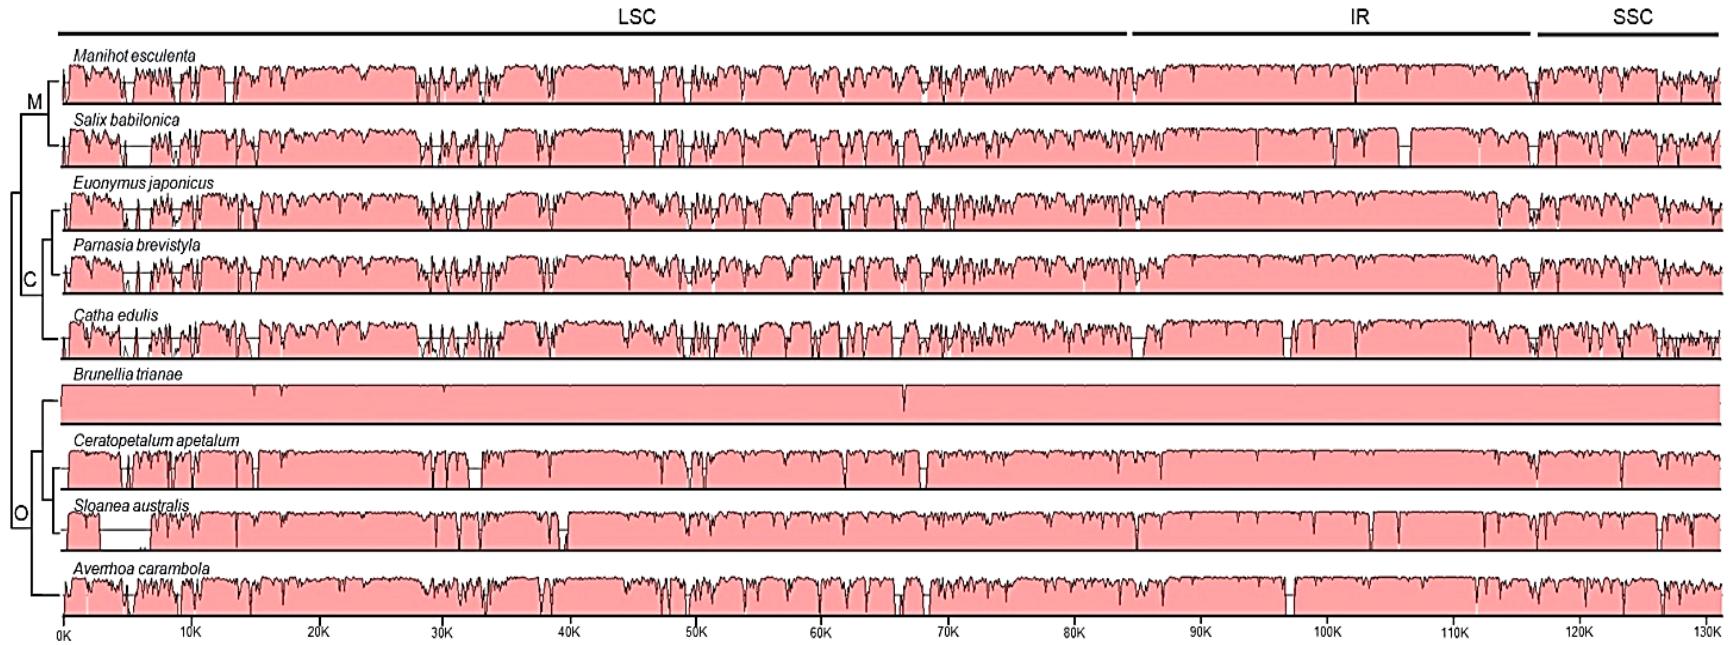



## Literature cited

- Asif MH, Mantri SS, Sharma A, Srivastava A, Trivedi I, Gupta P, Mohanty CS, Sawant SV, Tuli R. 2010. Complete sequence and organisation of the *Jatropha curcas* (Euphorbiaceae) chloroplast genome. *Tree Genetics & Genomes* 6:941–952. DOI: 10.1007/s11295-010-0303-0.
- Bausher MG, Singh ND, Lee S-B, Jansen RK, Daniell H. 2006. The complete chloroplast genome sequence of *Citrus sinensis* (L.) Osbeck var “Ridge Pineapple”: organization and phylogenetic relationships to other angiosperms. *BMC Plant Biology* 6:21. DOI: 10.1186/1471-2229-6-21.
- Burleigh JG, Hilu KW, Soltis DE. 2009. Inferring phylogenies with incomplete data sets: a 5-gene, 567-taxon analysis of angiosperms. *BMC Evolutionary Biology* 9:61. DOI: 10.1186/1471-2148-9-61.
- Cauz-Santos LA, Munhoz CF, Rodde N, Cauet S, Santos AA, Penha HA, Dornelas MC, Varani AM, Oliveira GCX, Bergès H, Vieira MLC. 2017. The chloroplast genome of *Passiflora edulis* (Passifloraceae) assembled from long sequence reads: Structural organization and phylogenomic studies in Malpighiales. *Frontiers in Plant Science* 8. DOI: 10.3389/fpls.2017.00334.
- Chen Z-D, Yang T, Lin L, Lu L-M, Li H-L, Sun M, Liu B, Chen M, Niu Y-T, Ye J-F, Cao Z-Y, Liu H-M, Wang X-M, Wang W, Zhang J-B, Meng Z, Cao W, Li J-H, Wu S-D, Zhao H-L, Liu Z-J, Du Z-Y, Wang Q-F, Guo J, Tan X-X, Su J-X, Zhang L-J, Yang L-L, Liao Y-Y, Li M-H, Zhang G-Q, Chung S-W, Zhang J, Xiang K-L, Li R-Q, Soltis DE, Soltis PS, Zhou S-L, Ran J-H, Wang X-Q, Jin X-H, Chen Y-S, Gao T-G, Li J-H, Zhang S-Z, Lu A-M, China Phylogeny Consortium. 2016. Tree of life for the genera of Chinese vascular plants: Tree of life of Chinese vascular plants. *Journal of Systematics and Evolution* 54:277–306. DOI: 10.1111/jse.12219.
- Cheng L, Huang W, Lan Y, Cao Q, Su S, Zhou Z, Wang J, Liu J, Hu G. 2018. The complete chloroplast genome sequence of the wild Chinese chestnut (*Castanea mollissima*). *Conservation Genetics Resources* 10:291–294. DOI: 10.1007/s12686-017-0805-2.
- Choi KS, Park S. 2016. The complete chloroplast genome sequence of *Euonymus japonicus* (Celastraceae). *Mitochondrial DNA Part A* 27:3577–3578. DOI: 10.3109/19401736.2015.1075127.
- Daniell H, Wurdack KJ, Kanagaraj A, Lee S-B, Saski C, Jansen RK. 2008. The complete nucleotide sequence of the cassava (*Manihot esculenta*) chloroplast genome and the evolution of *atpF* in Malpighiales: RNA editing and multiple losses of a group II intron. *Theoretical and Applied Genetics* 116:723. DOI: 10.1007/s00122-007-0706-y.
- Davis CC, Wurdack KJ. 2004. Host-to-parasite gene transfer in flowering plants: Phylogenetic evidence from Malpighiales. *Science* 305:676–678. DOI: 10.1126/science.1100671.
- Foster CSP, Sauquet H, van der Merwe M, McPherson H, Rossetto M, Ho SYW. 2016. Evaluating the impact of genomic data and priors on bayesian estimates of the Angiosperm evolutionary timescale. *Systematic Biology*:syw086. DOI: 10.1093/sysbio/syw086.
- Gitzendanner MA, Soltis PS, Wong GK, Ruhfel BR, Soltis DE. 2018. Plastid phylogenomic analysis of green plants: a billion years of evolutionary history. *American Journal of Botany* 105:291–301.
- Greiner S, Wang X, Herrmann RG, Rauwolf U, Mayer K, Haberer G, Meurer J. 2008. The complete nucleotide sequences of the 5 genetically distinct plastid genomes of *Oenothera*,

- subsection *Oenothera*: II. A microevolutionary view using bioinformatics and formal genetic data. *Molecular Biology and Evolution* 25:2019–2030. DOI: 10.1093/molbev/msn149.
- Gu C, Tembrock LR, Zheng S, Wu Z. 2018. The complete chloroplast genome of *Catha edulis*: A comparative analysis of genome features with related species. *International Journal of Molecular Sciences* 19:525. DOI: 10.3390/ijms19020525.
- Jansen RK, Cai Z, Raubeson LA, Daniell H, dePamphilis CW, Leebens-Mack J, Muller KF, Guisinger-Bellian M, Haberle RC, Hansen AK, Chumley TW, Lee S-B, Peery R, McNeal JR, Kuehl JV, Boore JL. 2007. Analysis of 81 genes from 64 plastid genomes resolves relationships in angiosperms and identifies genome-scale evolutionary patterns. *Proceedings of the National Academy of Sciences* 104:19369–19374. DOI: 10.1073/pnas.0709121104.
- Jansen RK, Saski C, Lee S-B, Hansen AK, Daniell H. 2011. Complete plastid genome sequences of three Rosids (*Castanea*, *Prunus*, *Theobroma*): Evidence for at least two independent transfers of *rpl22* to the nucleus. *Molecular Biology and Evolution* 28:835–847. DOI: 10.1093/molbev/msq261.
- Jo S, Kim HW, Kim YK, Cheon SH, Kim K-J. 2016. Complete plastome sequence of *Averrhoa carambola* L. (Oxalidaceae). *Mitochondrial DNA Part B* 1:609–611. DOI: 10.1080/23802359.2016.1209095.
- Kim H-W, Kim K-J. 2016. The complete plastome sequence of *Pentactina rupicola* Nakai (Rosaceae), a genus endemic to Korea. *Mitochondrial DNA Part B* 1:698–700. DOI: 10.1080/23802359.2016.1225523.
- Li H-T, Yi T-S, Gao L-M, Ma P-F, Zhang T, Yang J-B, Gitzendanner MA, Fritsch PW, Cai J, Luo Y, Wang H, van der Bank M, Zhang S-D, Wang Q-F, Wang J, Zhang Z-R, Fu C-N, Yang J, Hollingsworth PM, Chase MW, Soltis DE, Soltis PS, Li D-Z. 2019. Origin of angiosperms and the puzzle of the Jurassic gap. *Nature Plants* 5:461–470. DOI: 10.1038/s41477-019-0421-0.
- Mao Q, Bi G. 2016. Complete chloroplast genome of *Ficus racemosa* (Moraceae). *Mitochondrial DNA Part A* 27:4655–4656. DOI: 10.3109/19401736.2015.1106488.
- Melodelima C, Lobléaux S. 2013. Complete *Arabidopsis thaliana* chloroplast genome sequence and insight into its polymorphism. *Meta Gene* 1:65–75. DOI: 10.1016/j.mgene.2013.10.004.
- Moore MJ, Hassan N, Gitzendanner MA, Bruenn RA, Croley M, Vandeventer A, Horn JW, Dhingra A, Brockington SF, Latvis M, Ramdial J, Alexandre R, Piedrahita A, Xi Z, Davis CC, Soltis PS, Soltis DE. 2011. Phylogenetic analysis of the plastid inverted repeat for 244 species: Insights into deeper-level angiosperm relationships from a long, slowly evolving sequence region. *International Journal of Plant Sciences* 172:541–558. DOI: 10.1086/658923.
- Moore MJ, Soltis PS, Bell CD, Burleigh JG, Soltis DE. 2010. Phylogenetic analysis of 83 plastid genes further resolves the early diversification of eudicots. *Proceedings of the National Academy of Sciences* 107:4623–4628. DOI: 10.1073/pnas.0907801107.
- Nickrent DL, Der JP, Anderson FE. 2005. Discovery of the photosynthetic relatives of the "Maltese mushroom" *Cynomorium*. *BMC Evolutionary Biology* 5:38.
- Okumura S, Sawada M, Park YW, Hayashi T, Shimamura M, Takase H, Tomizawa K-I. 2006. Transformation of poplar (*Populus alba*) plastids and expression of foreign proteins in tree chloroplasts. *Transgenic Research* 15:637–646. DOI: 10.1007/s11248-006-9009-3.

- Paiva JA, Prat E, Vautrin S, Santos MD, San-Clemente H, Brommonschenkel S, Fonseca PG, Grattapaglia D, Song X, Ammiraju JS, Kudrna D, Wing RA, Freitas AT, Bergès H, Grima-Pettenati J. 2011. Advancing *Eucalyptus* genomics: identification and sequencing of lignin biosynthesis genes from deep-coverage BAC libraries. *BMC Genomics* 12. DOI: 10.1186/1471-2164-12-137.
- Qiu Y-L, Li L, Wang B, Xue J-Y, Hendry TA, Li R-Q, Brown JW, Liu Y, Hudson GT, Chen Z-D. 2010. Angiosperm phylogeny inferred from sequences of four mitochondrial genes. *Journal of Systematics and Evolution* 48:391–425. DOI: 10.1111/j.1759-6831.2010.00097.x.
- Ravi V, Khurana JP, Tyagi AK, Khurana P. 2006. The chloroplast genome of mulberry: complete nucleotide sequence, gene organization and comparative analysis. *Tree Genetics & Genomes* 3:49–59. DOI: 10.1007/s11295-006-0051-3.
- Rivarola M, Foster JT, Chan AP, Williams AL, Rice DW, Liu X, Melake-Berhan A, Huot Creasy H, Puiu D, Rosovitz MJ, Khouri HM, Beckstrom-Sternberg SM, Allan GJ, Keim P, Ravel J, Rabinowicz PD. 2011. Castor bean organelle genome sequencing and worldwide genetic diversity analysis. *PLoS ONE* 6:e21743. DOI: 10.1371/journal.pone.0021743.
- Rodríguez-Moreno L, González VM, Benjak A, Martí MC, Puigdomènech P, Aranda MA, Garcia-Mas J. 2011. Determination of the melon chloroplast and mitochondrial genome sequences reveals that the largest reported mitochondrial genome in plants contains a significant amount of DNA having a nuclear origin. *BMC Genomics* 12. DOI: 10.1186/1471-2164-12-424.
- Ruhfel BR, Gitzendanner MA, Soltis PS, Soltis DE, Burleigh JG. 2014a. Data from: From algae to angiosperms—inferring the phylogeny of green plants (Viridiplantae) from 360 plastid genomes. DOI: 10.5061/dryad.k1t1f.
- Ruhfel BR, Gitzendanner MA, Soltis PS, Soltis DE, Burleigh JG. 2014b. From algae to angiosperms—inferring the phylogeny of green plants (Viridiplantae) from 360 plastid genomes. *BMC Evolutionary Biology* 14:23.
- Santos V, Almeida C, Santos V, Almeida C. 2019. The complete chloroplast genome sequences of three *Spondias* species reveal close relationship among the species. *Genetics and Molecular Biology* 42:132–138. DOI: 10.1590/1678-4685-gmb-2017-0265.
- Saski C, Lee S-B, Daniell H, Wood TC, Tomkins J, Kim H-G, Jansen RK. 2005. Complete chloroplast genome sequence of *Glycine max* and comparative analyses with other legume genomes. *Plant Molecular Biology* 59:309–322. DOI: 10.1007/s11103-005-8882-0.
- Sato S. 1999. Complete structure of the chloroplast genome of *Arabidopsis thaliana*. *DNA Research* 6:283–290. DOI: 10.1093/dnares/6.5.283.
- Schwarz EN, Ruhlman TA, Sabir JSM, Hajrah NH, Alharbi NS, Al-Malki AL, Bailey CD, Jansen RK. 2015. Plastid genome sequences of legumes reveal parallel inversions and multiple losses of *rps16* in papilionoids: Parallel inversions and *rps16* losses in legumes. *Journal of Systematics and Evolution* 53:458–468. DOI: 10.1111/jse.12179.
- Soltis DE, Gitzendanner MA, Soltis PS. 2007. A 567-taxon data set for angiosperms: the challenges posed by Bayesian analyses of large data sets. *International Journal of Plant Sciences* 168:137–157.
- Soltis DE, Smith SA, Cellinese N, Wurdack KJ, Tank DC, Brockington SF, Refulio-Rodriguez NF, Walker JB, Moore MJ, Carlswald BS, Bell CD, Latvis M, Crawley S, Black C, Diouf D, Xi Z, Rushworth CA, Gitzendanner MA, Sytsma KJ, Qiu Y-L, Hilu KW, Davis CC, Sanderson MJ, Beaman RS, Olmstead RG, Judd WS, Donoghue MJ, Soltis PS. 2011.

- Angiosperm phylogeny: 17 genes, 640 taxa. *American Journal of Botany* 98:704–730. DOI: 10.3732/ajb.1000404.
- Sun Y, Moore MJ, Zhang S, Soltis PS, Soltis DE, Zhao T, Meng A, Li X, Li J, Wang H. 2016. Phylogenomic and structural analyses of 18 complete plastomes across nearly all families of early-diverging eudicots, including an angiosperm-wide analysis of IR gene content evolution. *Molecular Phylogenetics and Evolution* 96:93–101. DOI: 10.1016/j.ympev.2015.12.006.
- Sun M, Soltis DE, Soltis PS, Zhu X, Burleigh JG, Chen Z. 2015. Deep phylogenetic incongruence in the angiosperm clade Rosidae. *Molecular Phylogenetics and Evolution* 83:156–166. DOI: 10.1016/j.ympev.2014.11.003.
- Wang H, Moore MJ, Soltis PS, Bell CD, Brockington SF, Alexandre R, Davis CC, Latvis M, Manchester SR, Soltis DE. 2009. Rosid radiation and the rapid rise of angiosperm-dominated forests. *Proceedings of the National Academy of Sciences* 106:3853–3858.
- Wang Y, Yang H. 2016. The complete chloroplast genome sequence of *Salix babylonica*. *Mitochondrial DNA Part A* 27:4683–4684. DOI: 10.3109/19401736.2015.1106501.
- Weng M-L, Blazier JC, Govindu M, Jansen RK. 2014. Reconstruction of the ancestral plastid genome in Geraniaceae reveals a correlation between genome rearrangements, repeats, and nucleotide substitution rates. *Molecular Biology and Evolution* 31:645–659. DOI: 10.1093/molbev/mst257.
- Weng M-L, Ruhlman TA, Jansen RK. 2017. Expansion of inverted repeat does not decrease substitution rates in *Pelargonium* plastid genomes. *New Phytologist* 214:842–851. DOI: 10.1111/nph.14375.
- Wu Z, Gui S, Quan Z, Pan L, Wang S, Ke W, Liang D, Ding Y. 2014. A precise chloroplast genome of *Nelumbo nucifera* (Nelumbonaceae) evaluated with Sanger, Illumina MiSeq, and PacBio RS II sequencing platforms: insight into the plastid evolution of basal eudicots. *BMC Plant Biology* 14:289.
- Wurdack KJ, Davis CC. 2009. Malpighiales phylogenetics: Gaining ground on one of the most recalcitrant clades in the angiosperm tree of life. *American Journal of Botany* 96:1551–1570. DOI: 10.3732/ajb.0800207.
- Xia M, Zhang F, Rao H, Chi X, Khan G, Zhang Y, Yu J, Chen S. 2018. Complete chloroplast genome sequence of *Parnassia brevistyla* (Celastraceae) and phylogenetic analysis with related species. *Mitochondrial DNA Part B* 3:1187–1188. DOI: 10.1080/23802359.2018.1524725.
- Xu Q, Xiong G, Li P, He F, Huang Y, Wang K, Li Z, Hua J. 2012. Analysis of complete nucleotide sequences of 12 *Gossypium* chloroplast genomes: Origin and evolution of allotetraploids. *PLoS ONE* 7:e37128. DOI: 10.1371/journal.pone.0037128.
- Zecca G, Grassi F, Tabidze V, Pipia I, Kotorashvili A, Kotaria N, Beridze T. 2019. Dates and rates in grape's plastomes: evolution in slow motion. *Current Genetics*. DOI: 10.1007/s00294-019-01004-7.
- Zhang Y-H, Huang Y, Li Z-M, Zhang S-D. 2019. Characterization of the complete chloroplast genome of the vulnerable agarwood tree, *Aquilaria yunnanensis* (Thymelaeaceae). *Conservation Genetics Resources* 11:161–164. DOI: 10.1007/s12686-018-0989-0.
- Zhang L-B, Simmons MP. 2006. Phylogeny and delimitation of the Celastrales inferred from nuclear and plastid genes. *Systematic Botany* 31:122–137. DOI: 10.1600/036364406775971778.

- Zhao K-K, Wang J-H, Cai Y-C, Zhu Z-X, López-Pujol J, Wang H-F. 2018. Complete chloroplast genome sequence of *Heritiera angustata* (Malvaceae): an endangered plant species. *Mitochondrial DNA Part B* 3:141–142. DOI: 10.1080/23802359.2017.1422398.
- Zhu X-Y, Chase MW, Qiu Y-L, Kong H-Z, Dilcher DL, Li J-H, Chen Z-D. 2007. Mitochondrial *matR* sequences help to resolve deep phylogenetic relationships in rosids. *BMC Evolutionary Biology* 7:217. DOI: 10.1186/1471-2148-7-217.
